# Supplementary material for: Preventing Childhood Adversity Through Economic Support and Social Norm Strategies
Source: PubMed Central journal article supplement — Am J Prev Med. Author manuscript; Available in PMC 2024 Apr 25. (PMC11045008; doi:10.1016/j.amepre.2021.11.016), 2022-06
Supplement: NIHMS1980825-supplement-Supplemental_Tables_and_Figures.pdf [file NIHMS1980825-supplement-Supplemental_Tables_and_Figures.pdf]

**Appendix**  
**Preventing Childhood Adversity Through Economic Support and Social Norm Strategies**  
**Ottley et al.**

**Appendix Figure 1.** Essentials for childhood program logic model.

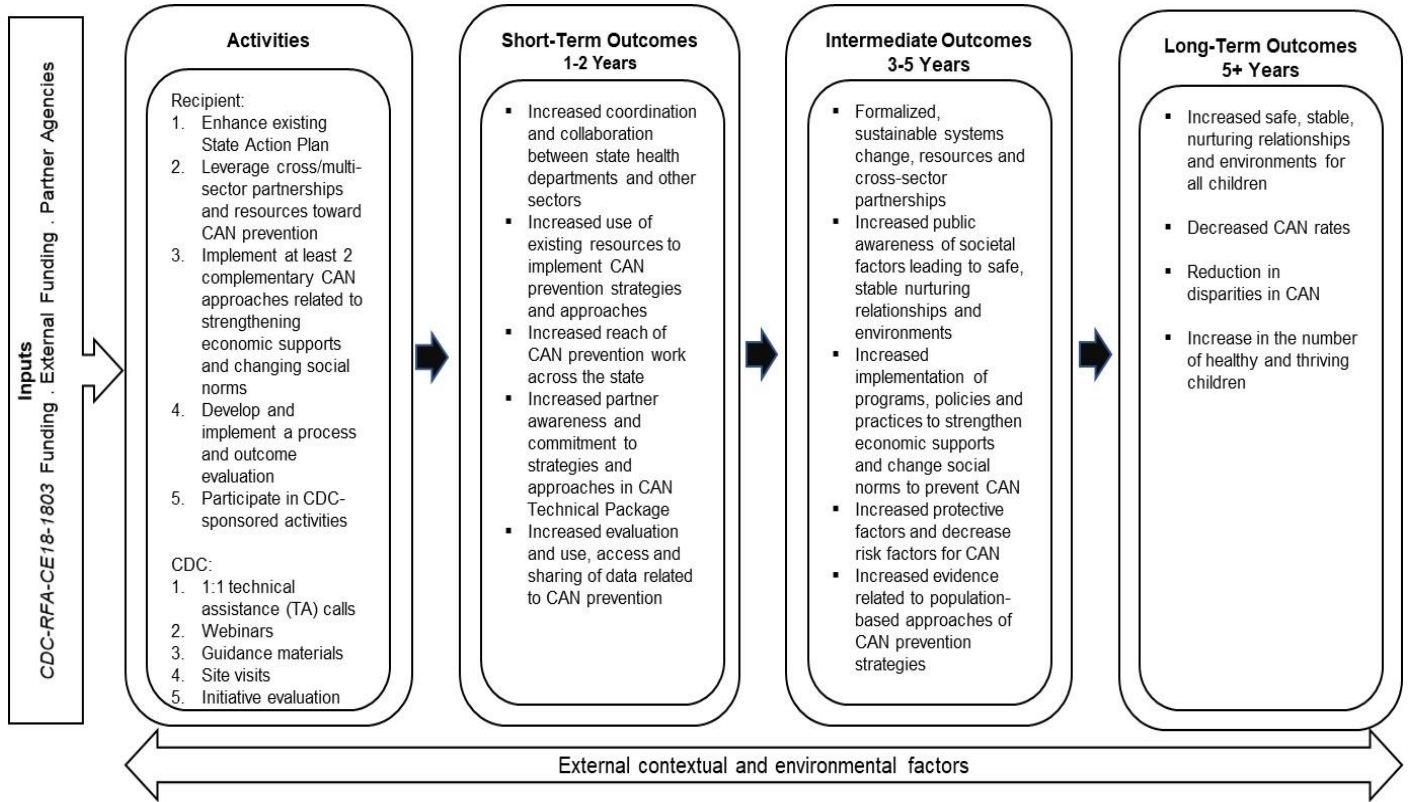

**Appendix**  
**Preventing Childhood Adversity Through Economic Support and Social Norm Strategies**  
**Ottley et al.**

**Appendix Table 1.** Prevention Strategies Implemented by States<sup>a</sup>

| Variable                                                            | Number of states |
|---------------------------------------------------------------------|------------------|
| <b>Strengthening economic supports</b>                              |                  |
| Family-friendly work policies                                       |                  |
| Paid family and medical leave                                       | 3                |
| Other efforts (including livable wages, consistent schedules, etc.) | 3                |
| <b>Strengthening household financial security</b>                   |                  |
| Increasing federal nutrition assistance program enrollment          | 2                |
| Increasing EITC access (including state programs)                   | 3                |
| Increasing TANF awareness and education                             | 1                |
| <b>Changing social norms</b>                                        |                  |
| Public engagement and education campaign                            |                  |
| Community connectedness                                             | 2                |
| Corporal punishment                                                 | 1                |
| Parenting norms (including help seeking)                            | 2                |
| Societal factors for SSNRE (including collective prosperity)        | 3                |

<sup>a</sup>States may implement more than 1 approach within the broad prevention strategy categories.

EITC, Earned Income Tax Credit; TANF, Temporary Assistance to Needy Families; Safe, stable, nurturing relationships and environments.

**Appendix**  
**Preventing Childhood Adversity Through Economic Support and Social Norm Strategies**  
**Ottley et al.**

**Appendix Table 2.** Most Common Outcomes for Implementation of Prevention Strategies and Identified Example Indicators<sup>a</sup>

| <b>Program-level outcomes</b>                                               | <b>N</b> | <b>Examples of indicators</b>                                                                                                                                                                                                                                                                                                                                                                                                                                                                                                                                                                                                             |
|-----------------------------------------------------------------------------|----------|-------------------------------------------------------------------------------------------------------------------------------------------------------------------------------------------------------------------------------------------------------------------------------------------------------------------------------------------------------------------------------------------------------------------------------------------------------------------------------------------------------------------------------------------------------------------------------------------------------------------------------------------|
| Increase in childcare subsidies or reimbursement for childcare programs     | 4        | <ul style="list-style-type: none"> <li>• Number of childcare subsidies</li> <li>• Reimbursement rate</li> </ul>                                                                                                                                                                                                                                                                                                                                                                                                                                                                                                                           |
| Increased access to and use of EITC for families                            | 4        | <ul style="list-style-type: none"> <li>• Proportion of EITC-eligible families that apply</li> <li>• Proportion of EITC-eligible families that receive the maximum amount possible</li> <li>• Number of families with access to EITC</li> <li>• Number of households using State EITC</li> </ul>                                                                                                                                                                                                                                                                                                                                           |
| Increased number of business partners that adopt family-friendly policies   | 4        | <ul style="list-style-type: none"> <li>• Number of business partners supporting the FMLI Act</li> <li>• Number of employers working on establishing family-friendly work policies</li> <li>• Number of employers implementing new policies for family-friendly workplaces</li> </ul> <p>Indicators for specific policies:</p> <ul style="list-style-type: none"> <li>• Number of businesses with flexible schedules</li> <li>• Number of businesses with paid sick and vacation leave</li> <li>• Number of businesses with breastfeeding friendly policies</li> <li>• Percent of employed adults with unpredictable work hours</li> </ul> |
| Increased number of families connected to resources (e.g., WIC, SNAP, etc.) | 3        | <ul style="list-style-type: none"> <li>• Enrollment gap (i.e., eligible versus enrolled) in WIC</li> <li>• Enrollment gap (i.e., eligible versus enrolled) in SNAP</li> </ul>                                                                                                                                                                                                                                                                                                                                                                                                                                                             |
| Increased number of family-friendly policies introduced and passed          | 3        | <ul style="list-style-type: none"> <li>• Number of family-friendly policies introduced at the state level</li> <li>• Number of family-friendly policies passed at the state level</li> </ul>                                                                                                                                                                                                                                                                                                                                                                                                                                              |

<sup>a</sup>Most common outcomes are those assessed by at least 3 states.

N, Number of states; EITC, Earned Income Tax Credit; FMLI Act, Family Medical Leave Insurance Program (Colorado); WIC, Special Supplemental Nutrition Program for Women, Infants and Children; SNAP, Supplemental Nutrition Assistance Program.

**Appendix**  
**Preventing Childhood Adversity Through Economic Support and Social Norm Strategies**  
**Ottley et al.**

**Appendix Table 3.** Outcomes and Indicators That Address Adverse Childhood Experiences (ACEs)

| <b>ACEs topic</b>         | <b>Example outcomes</b>                                                                                                                     | <b>Examples of indicators</b>                                                                                                                                                                                                                                                                 |
|---------------------------|---------------------------------------------------------------------------------------------------------------------------------------------|-----------------------------------------------------------------------------------------------------------------------------------------------------------------------------------------------------------------------------------------------------------------------------------------------|
| Household mental illness  | Increased protective factors for child abuse and neglect (CAN)                                                                              | <ul style="list-style-type: none"> <li>Percent receiving prenatal and early childhood screening for intimate partner violence (IPV) and maternal depression</li> </ul>                                                                                                                        |
|                           | Decreased risk factors for CAN:                                                                                                             | <ul style="list-style-type: none"> <li>Percent of mothers experiencing maternal postpartum depression</li> <li>Percent of women reporting their doctor, nurse, or other healthcare provider talked to them about depression during a prenatal visit</li> </ul>                                |
| Household substance abuse | Decreased rates of opioid misuse, overdose, and other opioid-related outcomes:                                                              | <ul style="list-style-type: none"> <li>Opioid-related morbidity and mortality</li> <li>Percent of past month illicit drug use among adults</li> </ul>                                                                                                                                         |
|                           | Reduce impacts of parent opioid use disorder (OUD):                                                                                         | <ul style="list-style-type: none"> <li>Percent of referrals to OUD treatment</li> <li>Percent of resources identified for finding pregnant women who have not yet engaged in any form of prenatal or substance use healthcare</li> </ul>                                                      |
|                           | More families who are in recovery are connected with services and maintain custody of their children or have their children in kinship care | <ul style="list-style-type: none"> <li>Percent of families with reported NAS or SEN who have infants removed</li> <li>Percent of children removed from families with reported NAS or SEN that are placed in kinship care</li> </ul>                                                           |
| Mother treated violently  | Reduced family violence in the state                                                                                                        | <ul style="list-style-type: none"> <li>Percent of children who have witnessed domestic violence</li> </ul>                                                                                                                                                                                    |
|                           | Decreased risk factors for CAN                                                                                                              | <ul style="list-style-type: none"> <li>Number of domestic violence incidents</li> <li>Percent of mothers reporting intimate partner violence (IPV)</li> <li>Percent of new mothers reporting physical partner violence during pregnancy</li> <li>Rate of intimate partner violence</li> </ul> |

**Appendix**  
**Preventing Childhood Adversity Through Economic Support and Social Norm Strategies**  
**Ottley et al.**

|                                |                                                   |                                                                                                                                                                                                                                                                                                                                                              |
|--------------------------------|---------------------------------------------------|--------------------------------------------------------------------------------------------------------------------------------------------------------------------------------------------------------------------------------------------------------------------------------------------------------------------------------------------------------------|
|                                |                                                   | <ul style="list-style-type: none"> <li>• Percent of women reporting their doctor, nurse, or other healthcare provider talked to them about partner abuse during a prenatal visit</li> </ul>                                                                                                                                                                  |
| Exposure to community violence | Reduced bullying and youth violence in the state: | <ul style="list-style-type: none"> <li>• Percent of children who have experienced bullying or youth violence</li> </ul>                                                                                                                                                                                                                                      |
| SES                            | Decreased risk factors for CAN:                   | <ul style="list-style-type: none"> <li>• Percent of children aged 0–5 years living in poverty</li> <li>• Percent of parents who report somewhat or very hard to get by on family’s income</li> <li>• Percent of children who are homeless</li> <li>• Percent of children living in neighborhoods with &gt;30% of residents below the poverty line</li> </ul> |

NAS, Neonatal abstinence syndrome; SEN, Substance-exposed newborn.
